# Supplementary material
Source: publisher figshare collection journal article supplement (https://acs.figshare.com/ndownloader/files/3898975)
Supplement: Supplementary file 1 [file 3898975]

## SUPPORTING INFORMATION

### **Direct Three-Dimensional Characterization and Multi-Scale Visualization of Wheat Straw Deconstruction by White Rot Fungus**

Li Liu<sup>1,2</sup>, Chen Qian<sup>2</sup>, Lei Jiang<sup>1,3\*</sup>, Han-Qing Yu<sup>2\*</sup>

<sup>1</sup>School of Chemistry and Environment, BeiHang University, Beijing, 100191, China

<sup>2</sup>Department of Chemistry, University of Science & Technology of China, Hefei,  
230026, China

<sup>3</sup>National Laboratory for Molecular Sciences Key Laboratory of Organic Solids  
Institute of Chemistry, Chinese Academy of Sciences, Beijing, 100190, China

#### **\*Corresponding authors:**

Prof. Lei Jiang, E-mail: [jianglei@iccas.ac.cn](mailto:jianglei@iccas.ac.cn); Prof. Han-Qing Yu, E-mail:  
[hqyu@ustc.edu.cn](mailto:hqyu@ustc.edu.cn)

This Supporting Information contains 7-page text, one table and five figures, including this cover page.

**TABLE S1. O/C Atomic Ratios and Relative C1–C4 Peak Areas of Straw and Its Main Components**

|                    | material                          | O/C  | C1<br>(%) | C2<br>(%) | C3<br>(%) |
|--------------------|-----------------------------------|------|-----------|-----------|-----------|
| theoretical values | epicuticular wax (31)             | 0.11 | 94.0      | 0.0       | 6.0       |
|                    | lignin (32)                       | 0.33 | 49.0      | 49.0      | 2.0       |
|                    | hemicellulose (31)                | 0.80 | 0.0       | 83.0      | 17.0      |
|                    | cellulose (32)                    | 0.83 | 0.0       | 83.0      | 17.0      |
| measured values    | untreated sample                  | 0.44 | 50.6      | 39.5      | 9.9       |
|                    | soaked in the PDA medium for 15 d | 0.43 | 52.4      | 38.7      | 6.9       |
|                    | fungal treated for 15 d           | 0.59 | 37.2      | 49.9      | 11.4      |

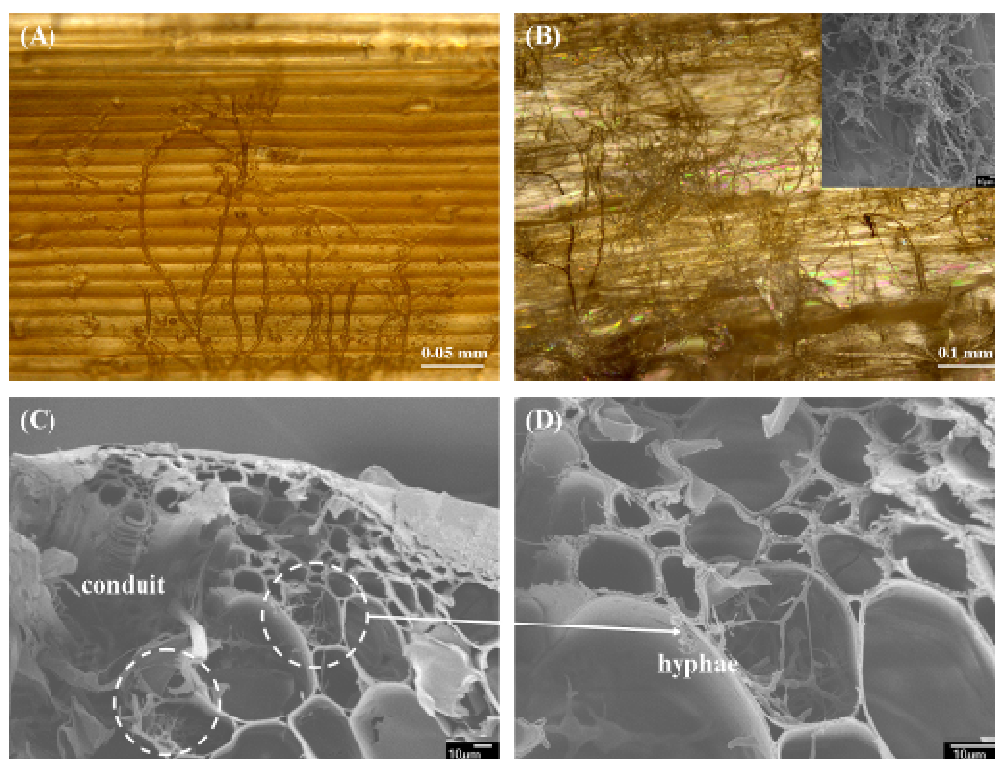

**Figure S1.** Straw slice after 5-d fungal degradation: (A) optical microscopic images of the outer layer surface morphology of the straw; (B) grown fungi hyphae in straw lumen after 5-d degradation (Inset shows the SEM images of the hyphae); SEM images of (C) the cross section of the straw after 5-d incubation; and (D) hyphae at high magnification.

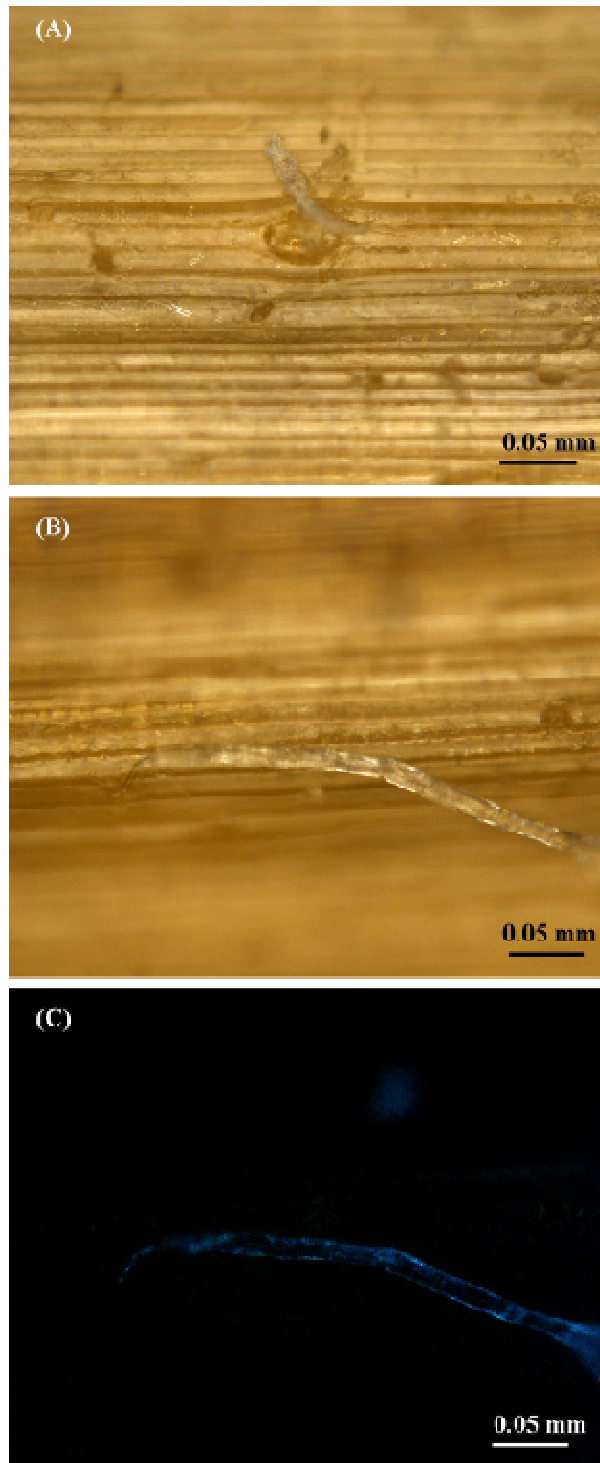

**Figure S2.** Images colonization of straw slice by fungal hyphae after 15 d: (A) fungal hyphae were found to penetrat the stomata of straw slice. (B) fungal hypha attached to the slice; and (C) fluorescence image of this hypha (stained by DAPI staining solution and viewed on a Nikon Eclipse Ti inverted microscope)

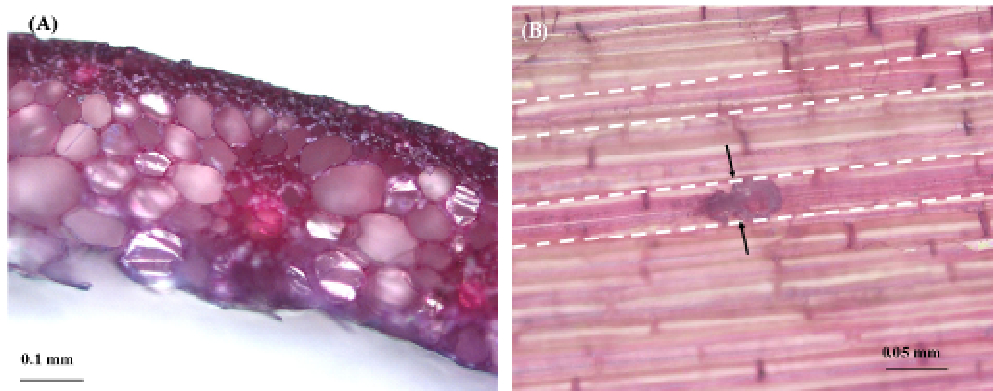

**Figure S3.** Lignin distribution (red color) of the straw slice stained by the phloroglucinol solution after 15-d fungal degradation: (A) cross section of the straw slice shows the lignin distributed in the vascular bundles; and (B) big holes distributed on the vascular bundles of the straw slice.

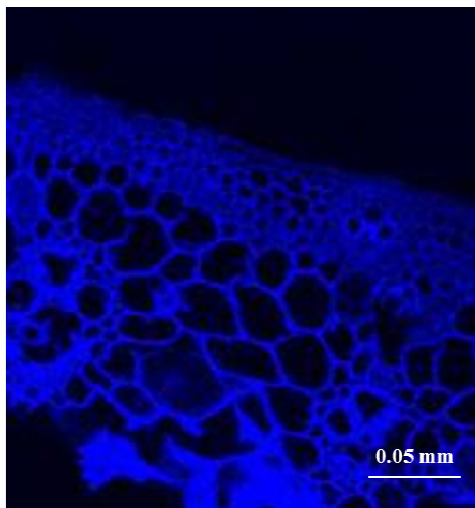

Figure S4. CLSM image of the control sample.

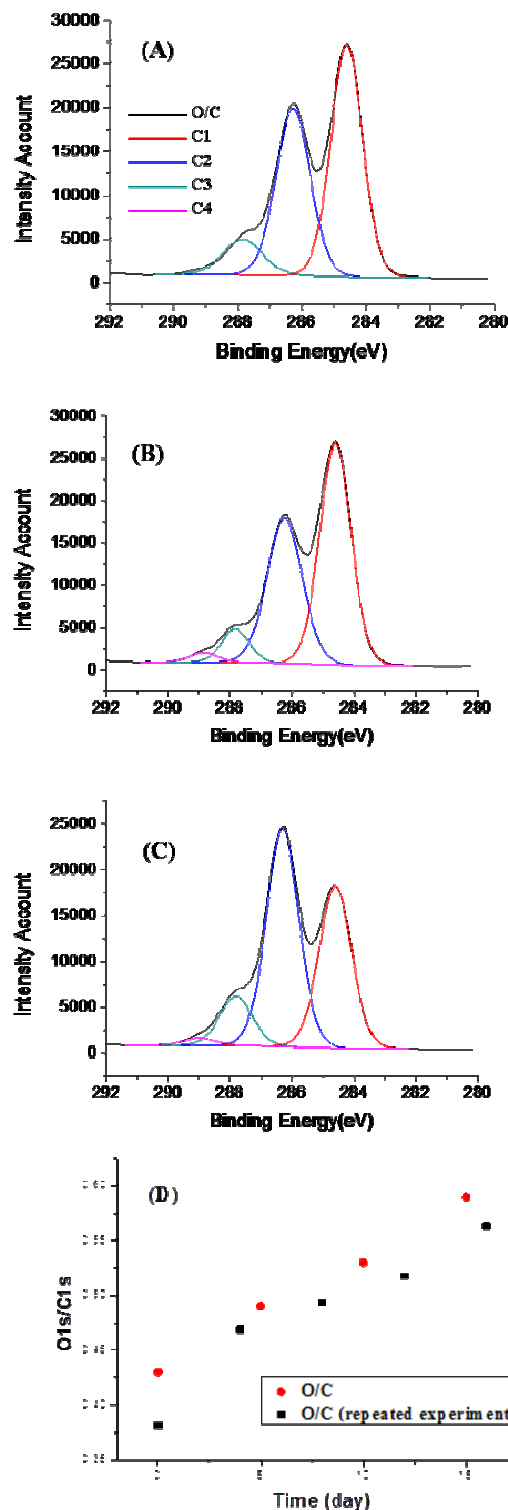

**Figure S5.** XPS spectra of C1s of straw slices: (A) untreated; (B) soaked in the PDA medium for 15 d; (C) *P. chrysosporium* degraded for 15 d; and (D) O/C of XPS results of the straw samples during the degradation process (the repeated experiment (black) and the original experiment (red)).
